# Supplementary material for: Modified Activated Carbon: A Supporting Material for Improving Clostridium beijerinckii TISTR1461 Immobilized Fermentation
Source: Hindawi journal article supplement (doi:10.1155/2023/3600404), 2023-03-23
Supplement: f1 [file 3600404.f1.docx]

**Electronic Supplementary Information**

# Modified Activated Carbon: A Supporting Material for Improving *Clostridium beijerinckii* TISTR1461 Immobilized Fermentation


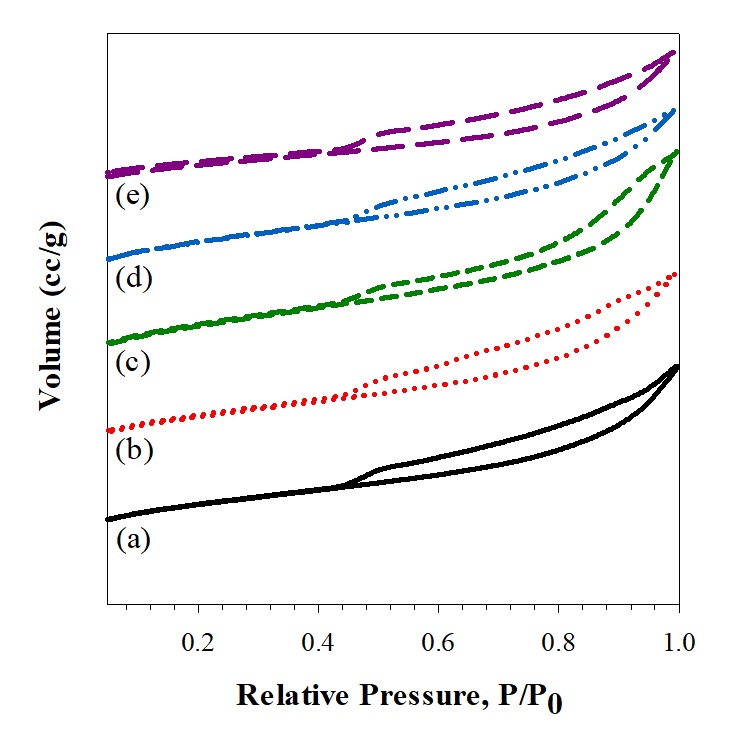


Figure S1: Representative N2 adsorption-desorption isotherms of the various types of activated carbon samples: (a) untreated (AC), (b) SHS, (c) NASHS, (d) SHR, and (e) APTESR.


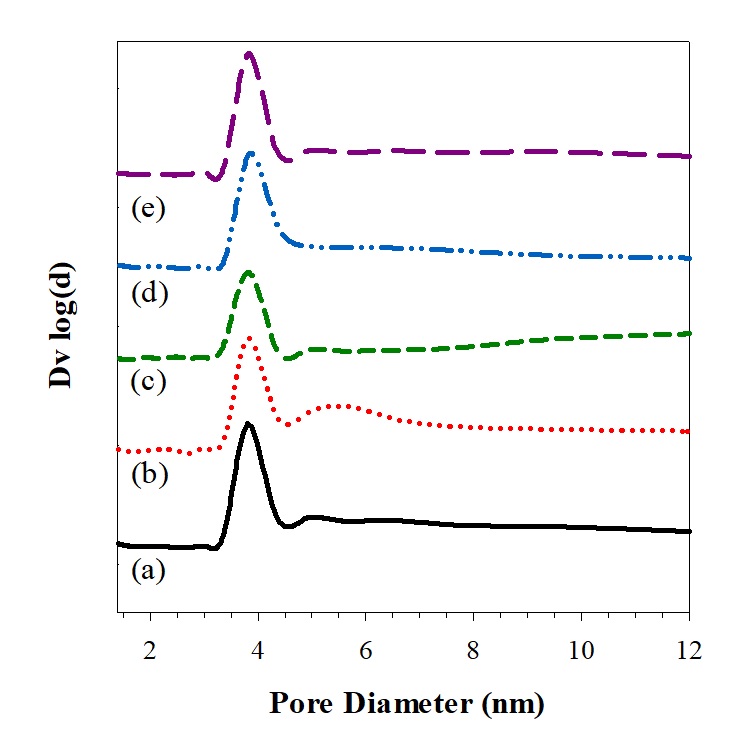


Figure S2: Representative BJH pore size distribution of the various types of activated carbon samples: (a) untreated (AC), (b) SHS, (c) NASHS, (d) SHR, and (e) APTESR.

**
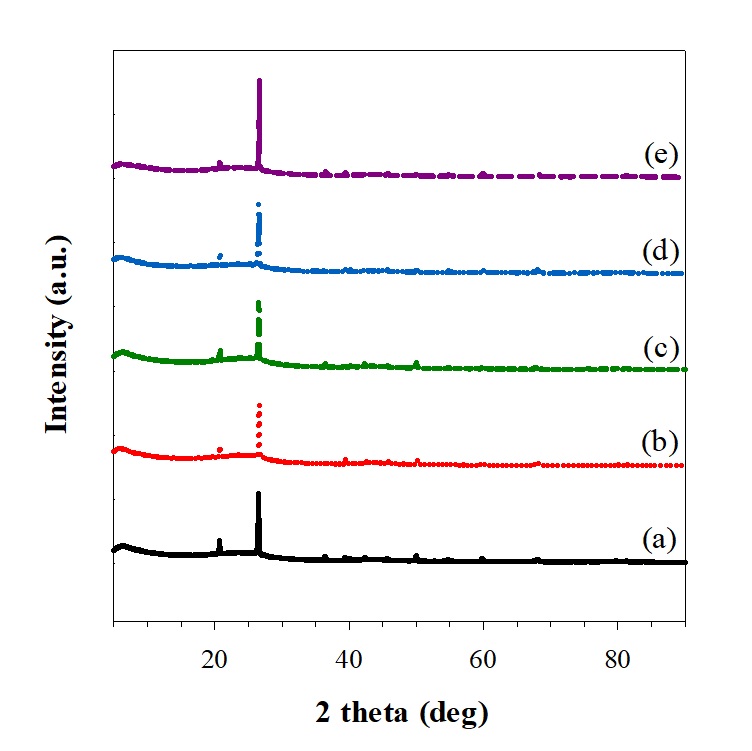
**

Figure S3: Representative XRD patterns of the various types of activated carbon samples: (a) untreated (AC), (b) SHS, (c) NASHS, (d) SHR, and (e) APTESR. (Conditions: range 5-90 degree at a scan speed 2 degree/min and step size of 0.01 degree).


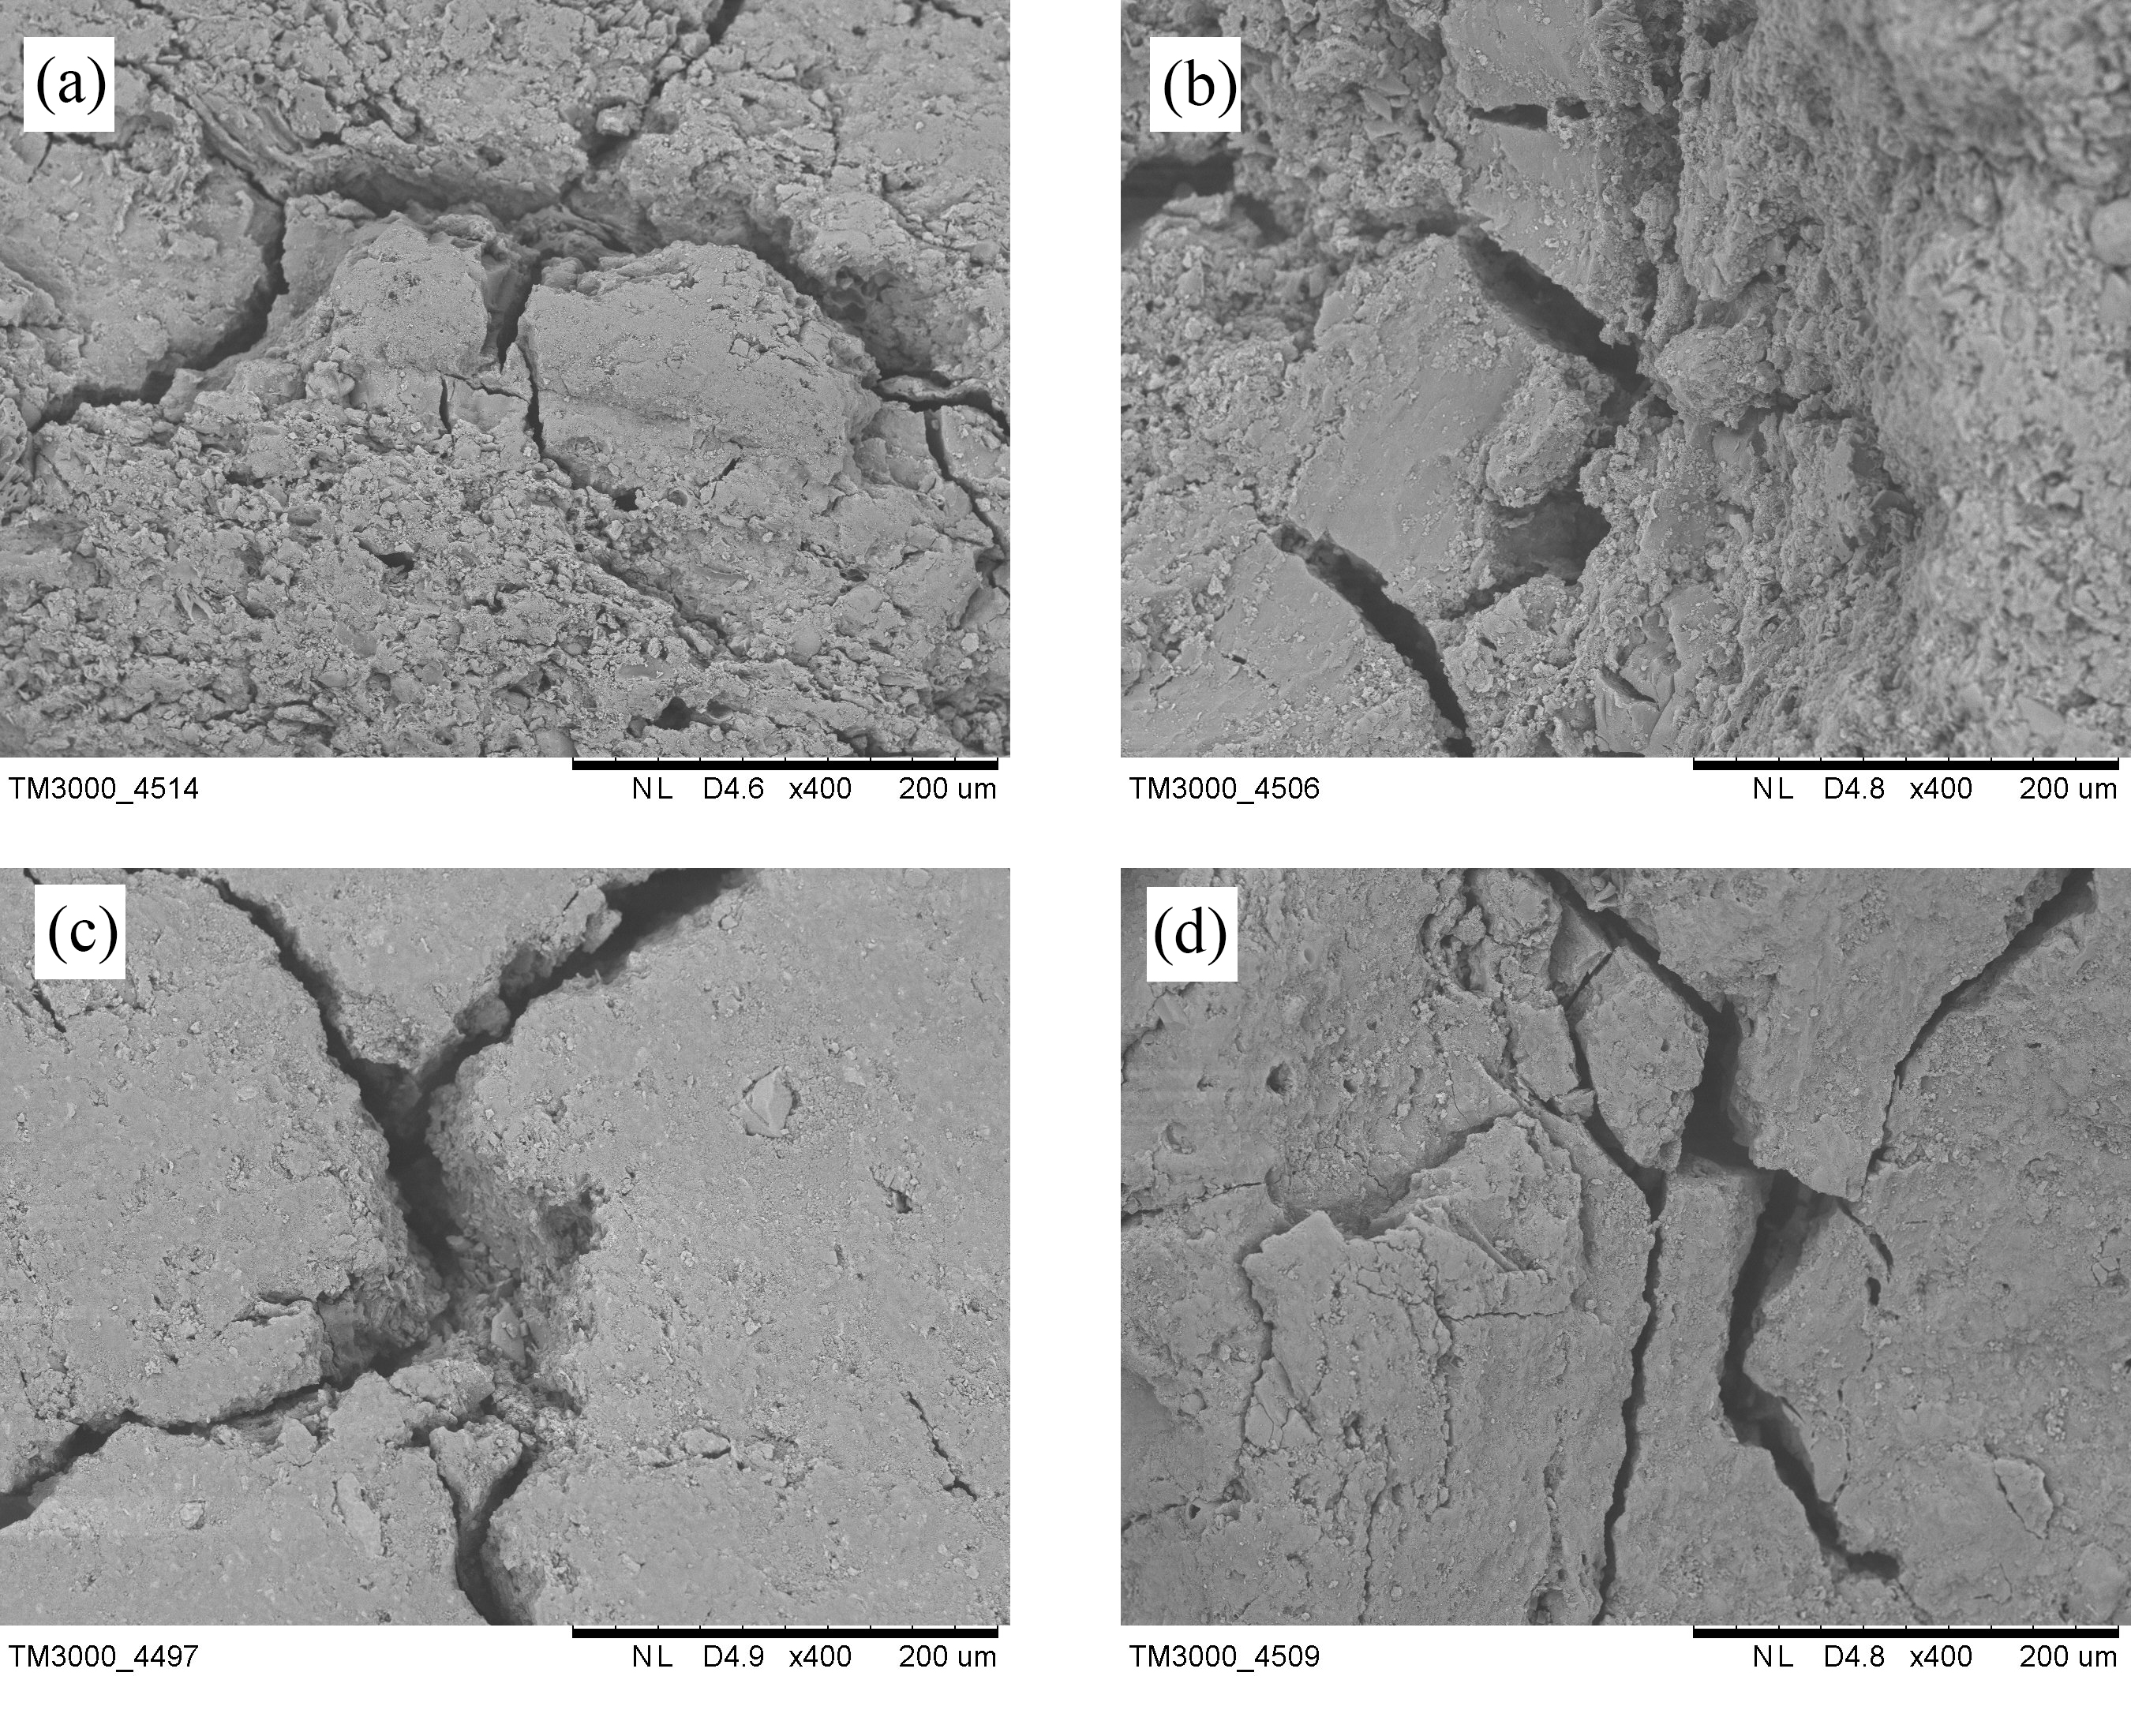


Figure S4: Representative SEM images at 400x magnification of crack on various treated activated carbons: (a) SHS, (b) NASHS, (c) SHR, and (d) APTESR.


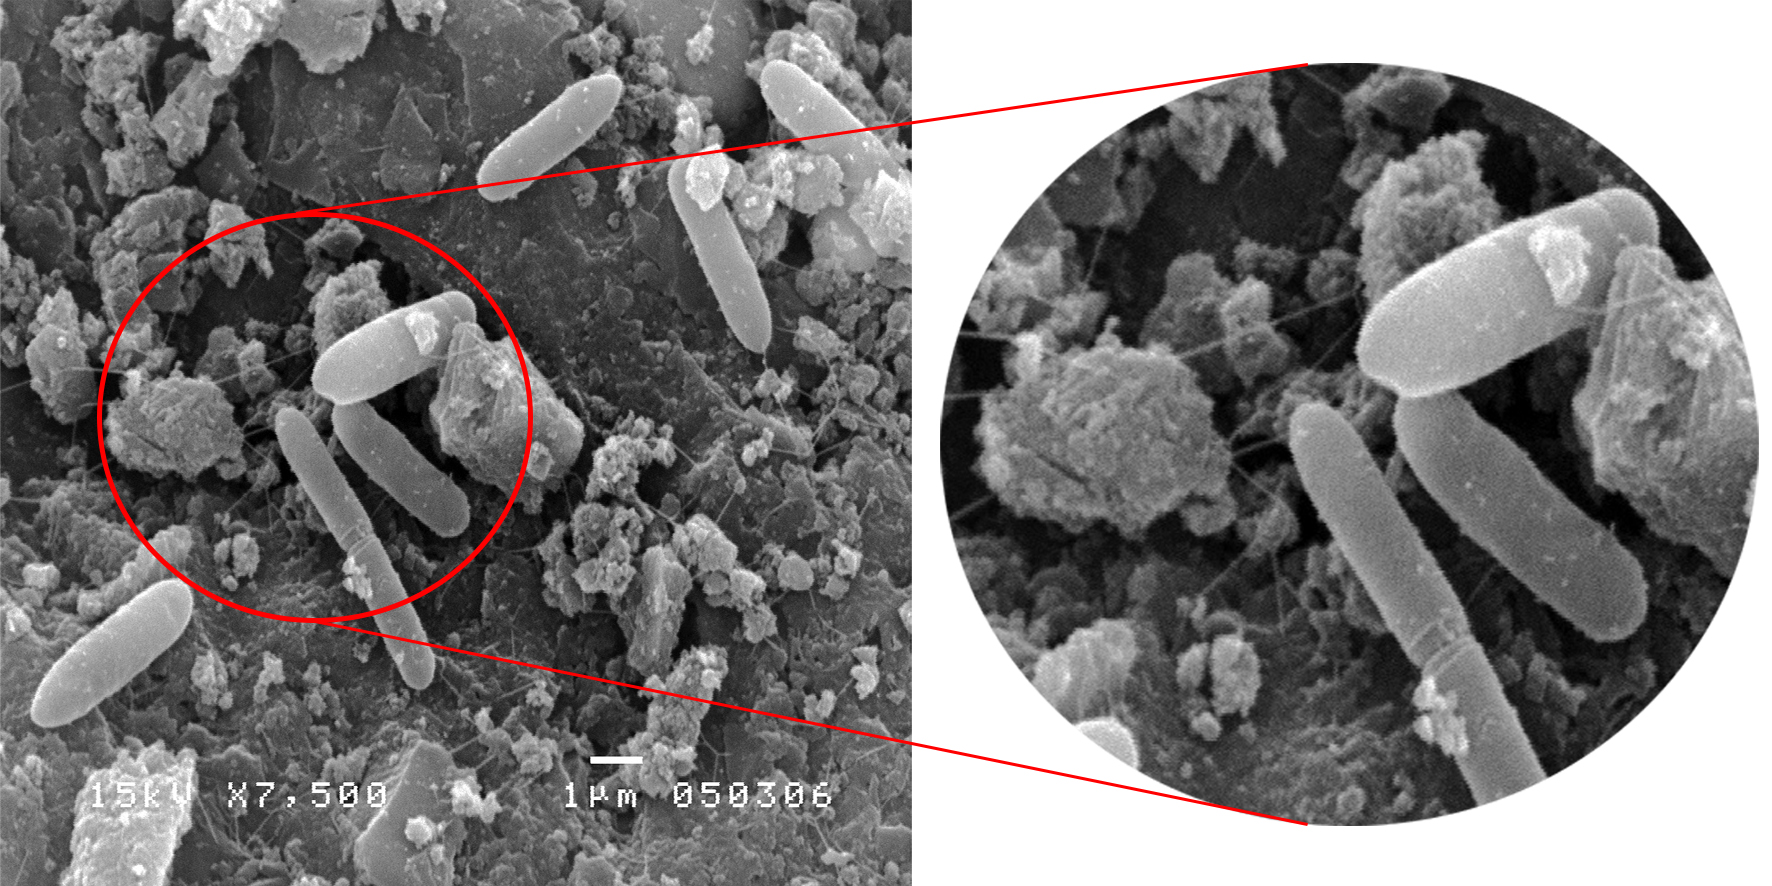


Figure S5: Representative SEM images at 7500x magnification of *C. beijerinckii*’s colonization on APTESR-treated AC after 120 h of batch fermentation.
